# Supplementary material for: Differential Grey Wolf Load-Balanced Stochastic Bellman Deep Reinforced Resource Allocation in Fog Environment
Source: Hindawi journal article supplement (doi:10.1155/2022/3183701), 2022-08-19
Supplement: f1 [file 3183701.f1.zip]

Archive with 2 entries (2 files):
- 3183701.f1/Supporting file1_Output screenshot (1).docx
- 3183701.f1/Supporting file2_Tables (1).docx
