# Supplementary material for: Differential Grey Wolf Load-Balanced Stochastic Bellman Deep Reinforced Resource Allocation in Fog Environment
Source: Hindawi journal article supplement (doi:10.1155/2022/3183701), 2022-08-19
Supplement: f1 [file 3183701.f1.zip › 3183701.f1/Supporting file1_Output screenshot (1).docx]

**List of Screenshots and output Graphs**

**
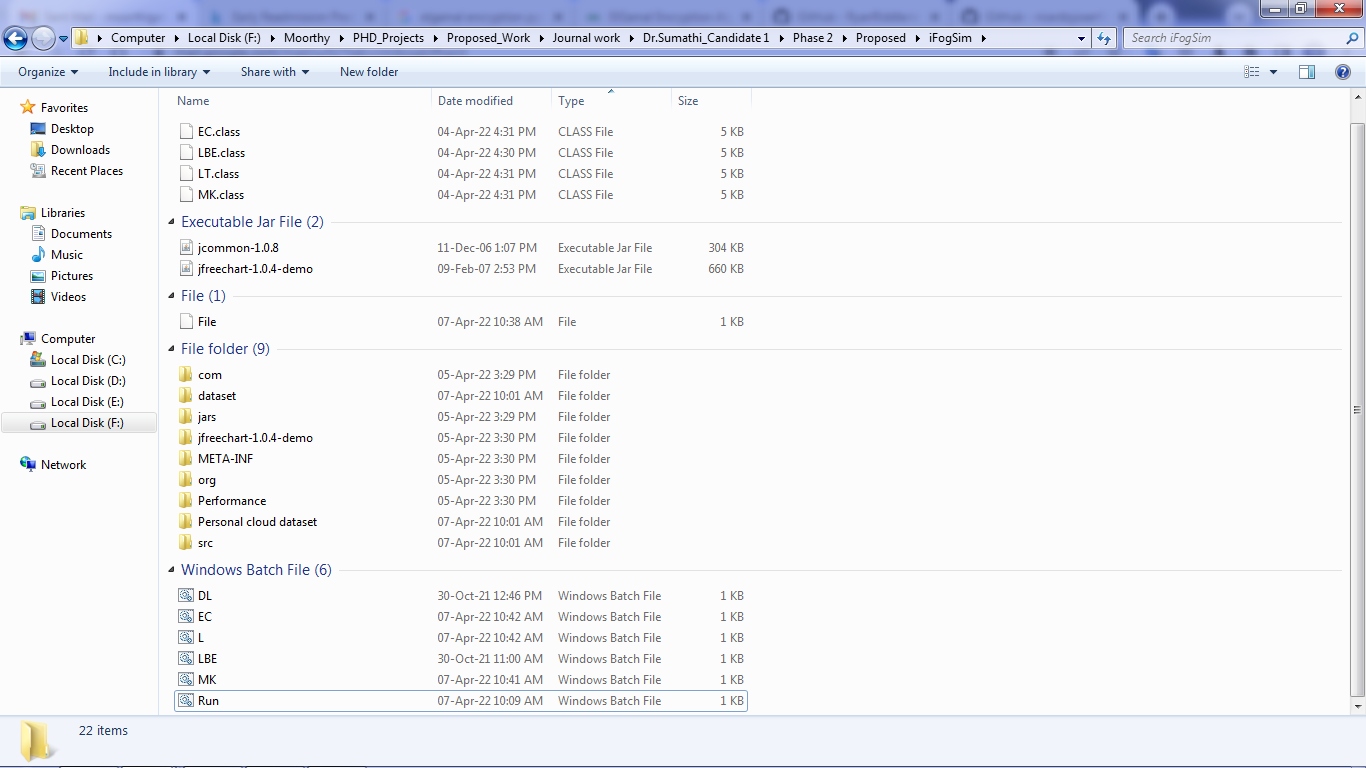
**

**
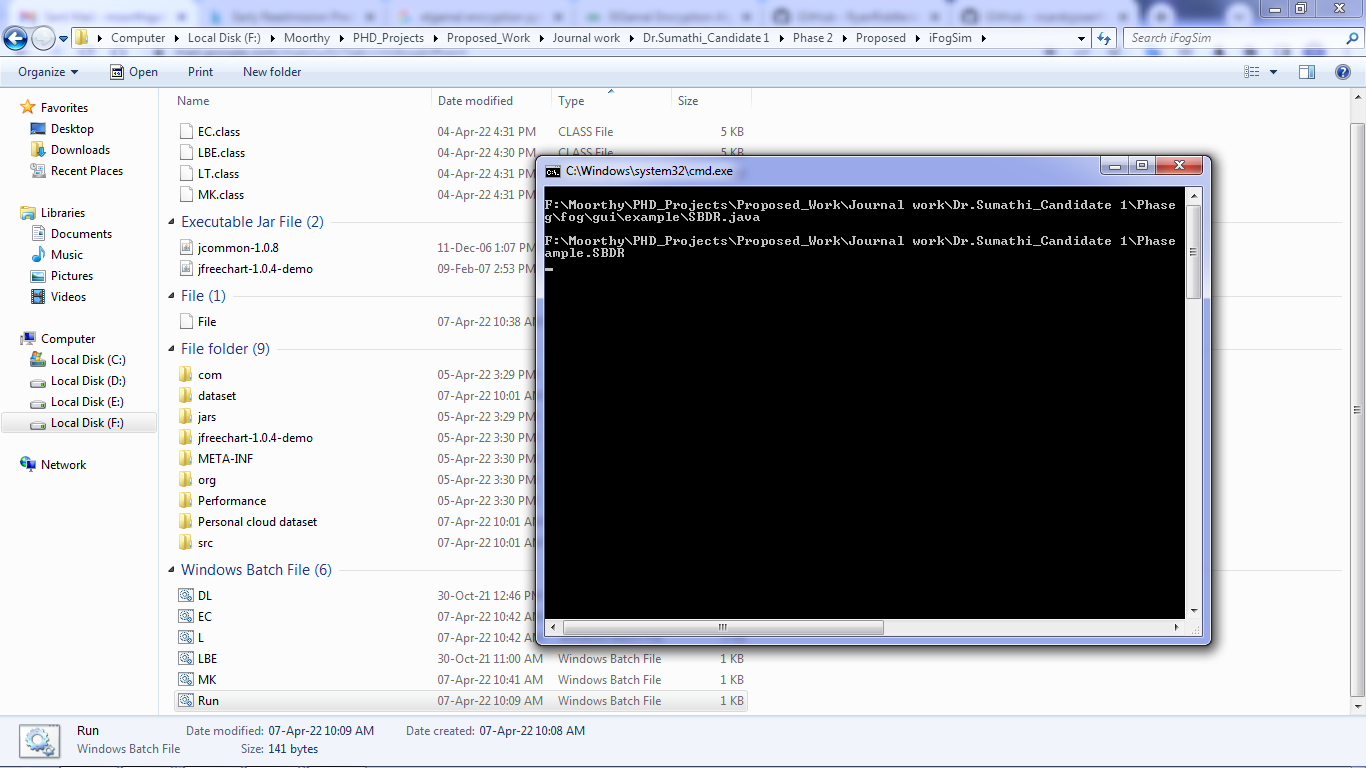
**

**
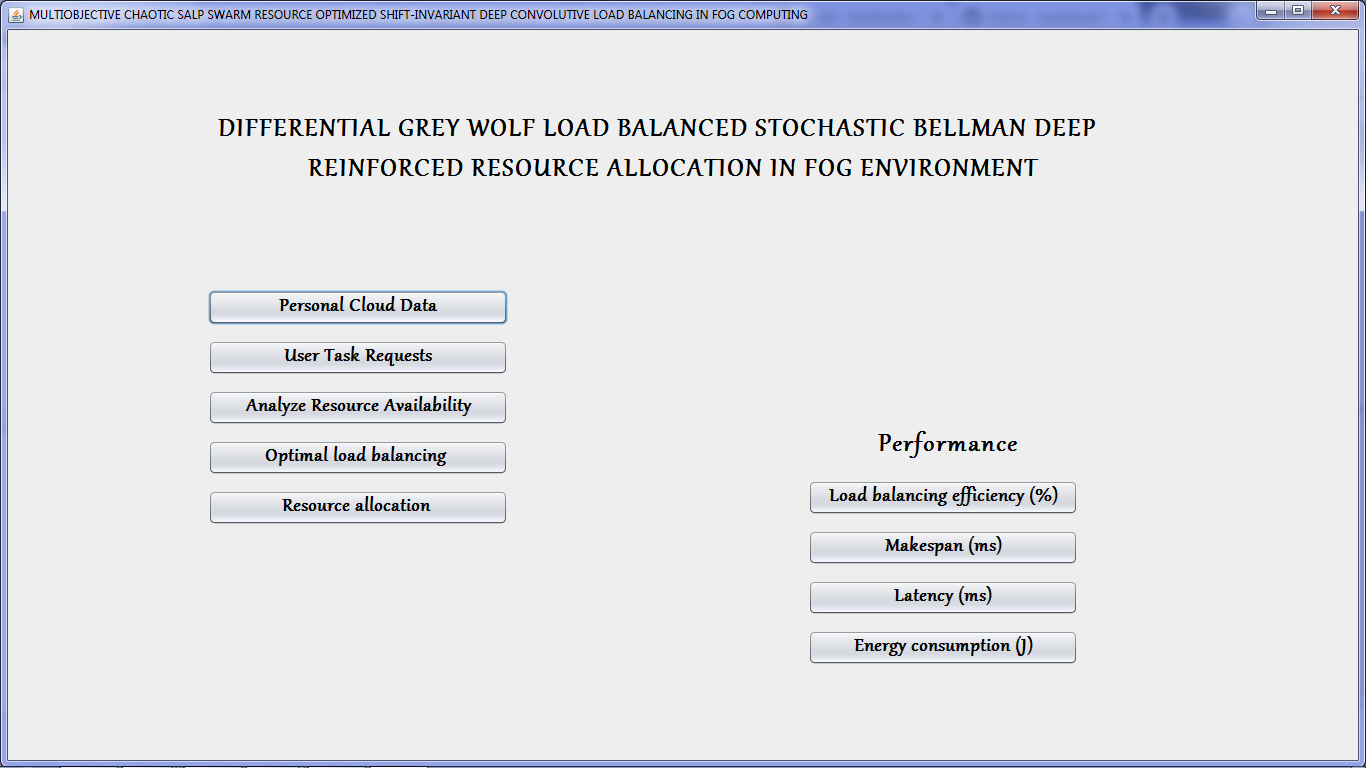
**

**ifogsim simulator screenshot -Figure-1**

**
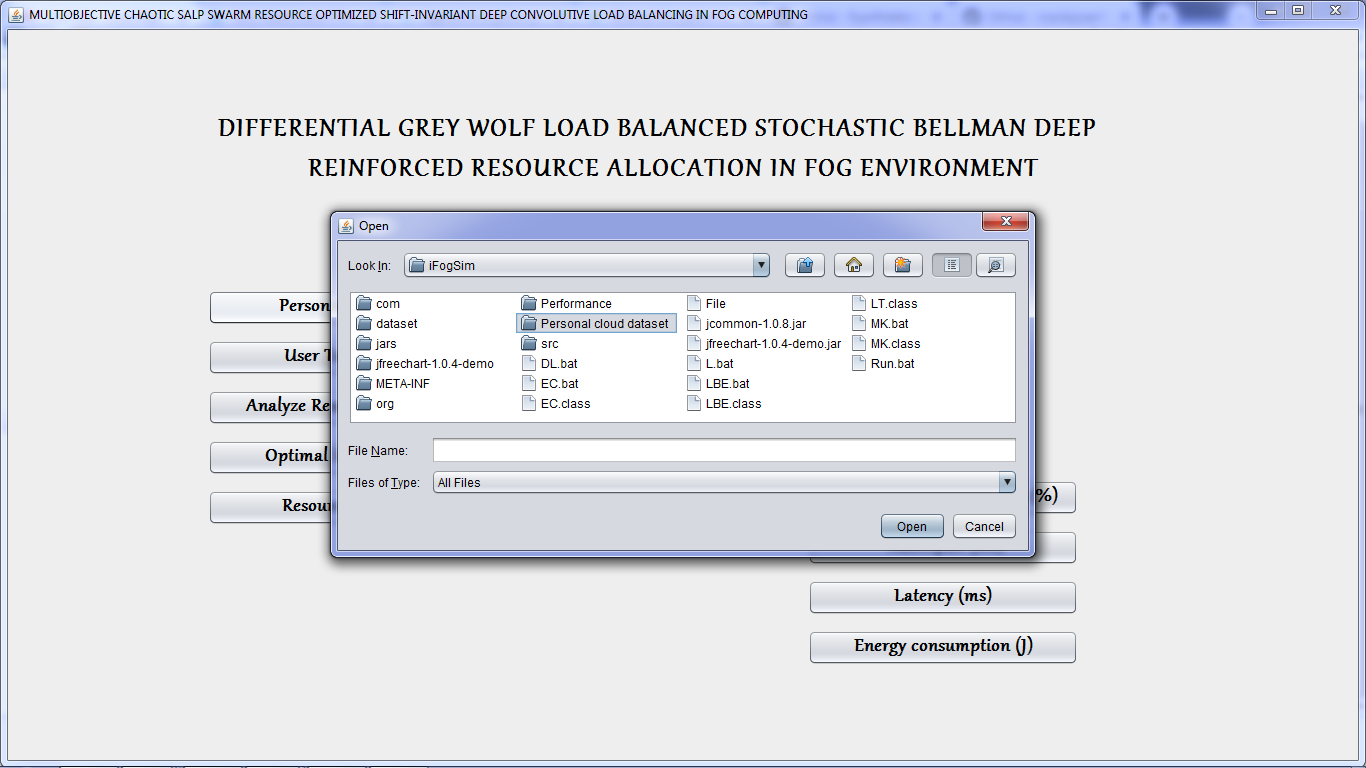
**

**ifogsim simulator input that selecting dataset screenshot-Figure-2**

**
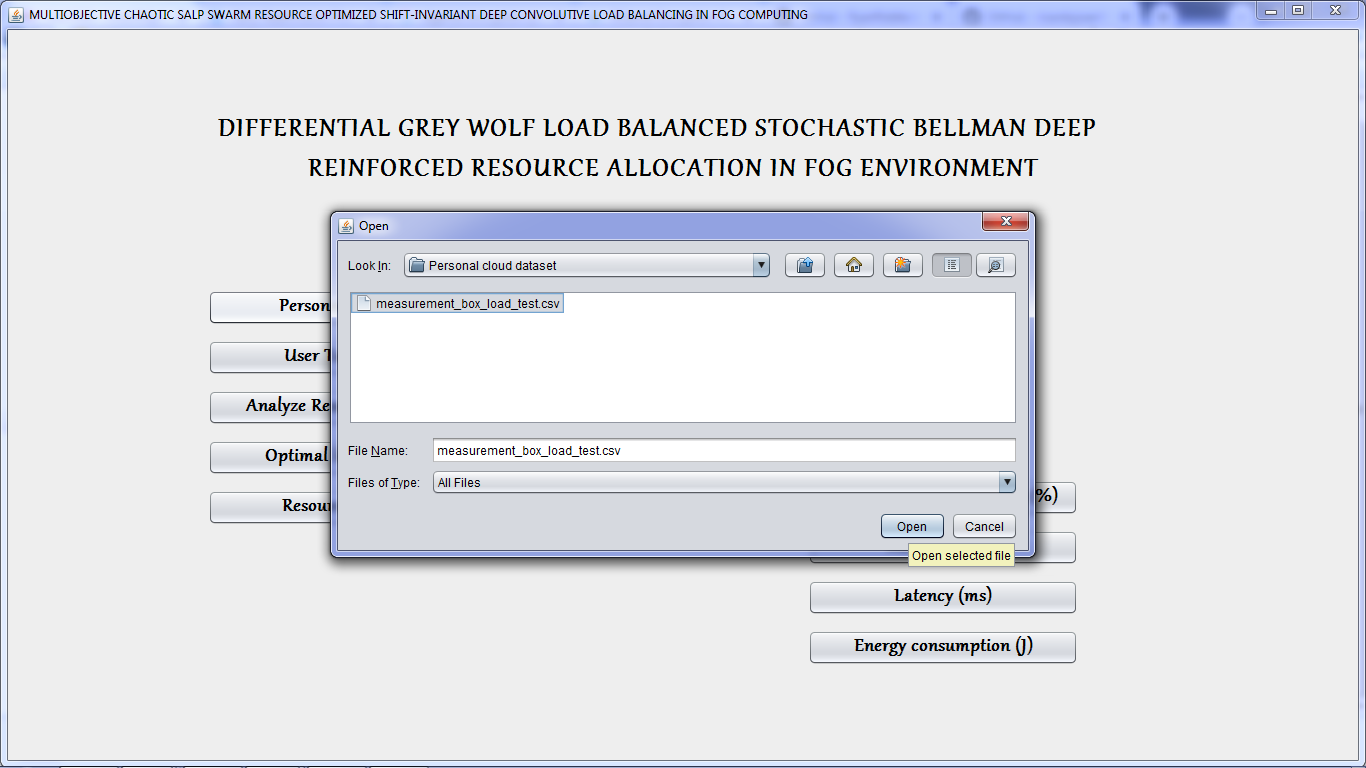
**

**ifogsim simulator input that selecting dataset screenshot-Figure-3**

**
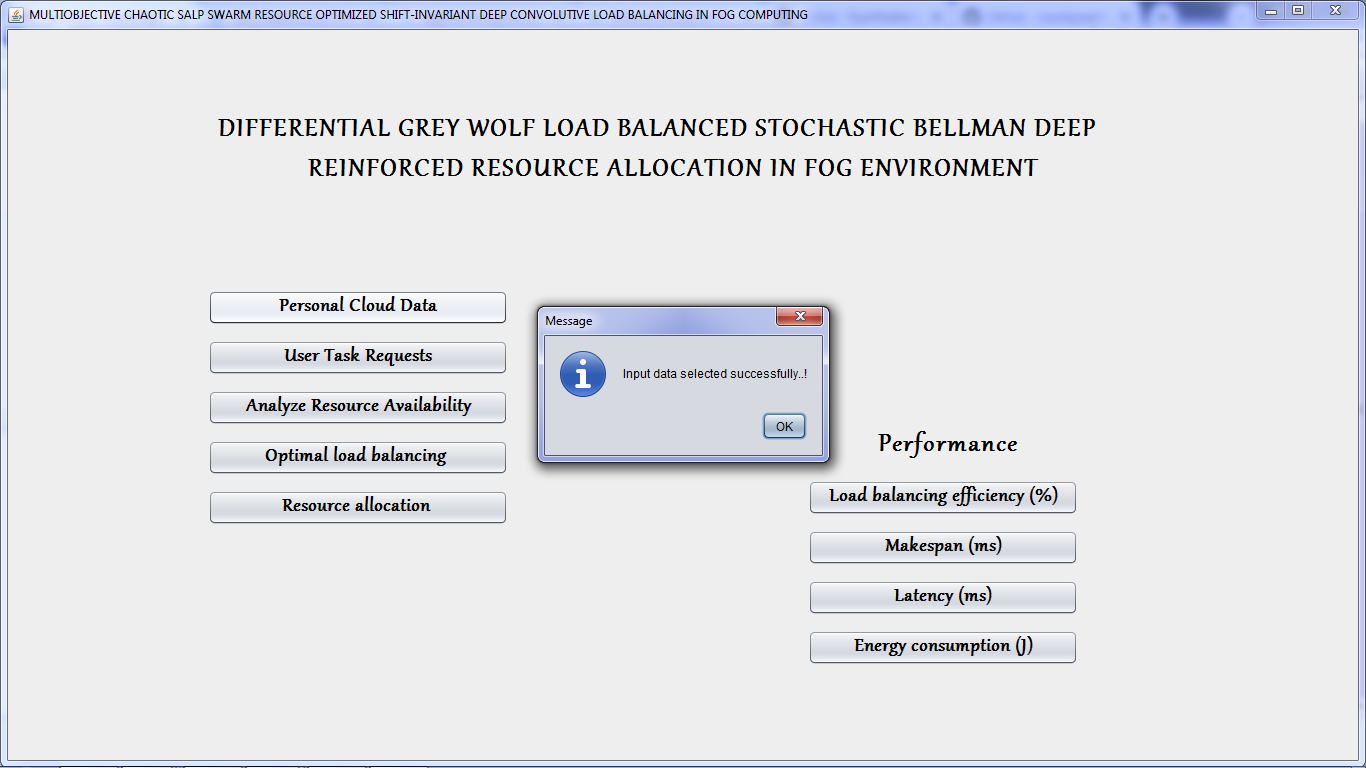
**

**ifogsim simulator input that selecting dataset screenshot-Figure-4**

**
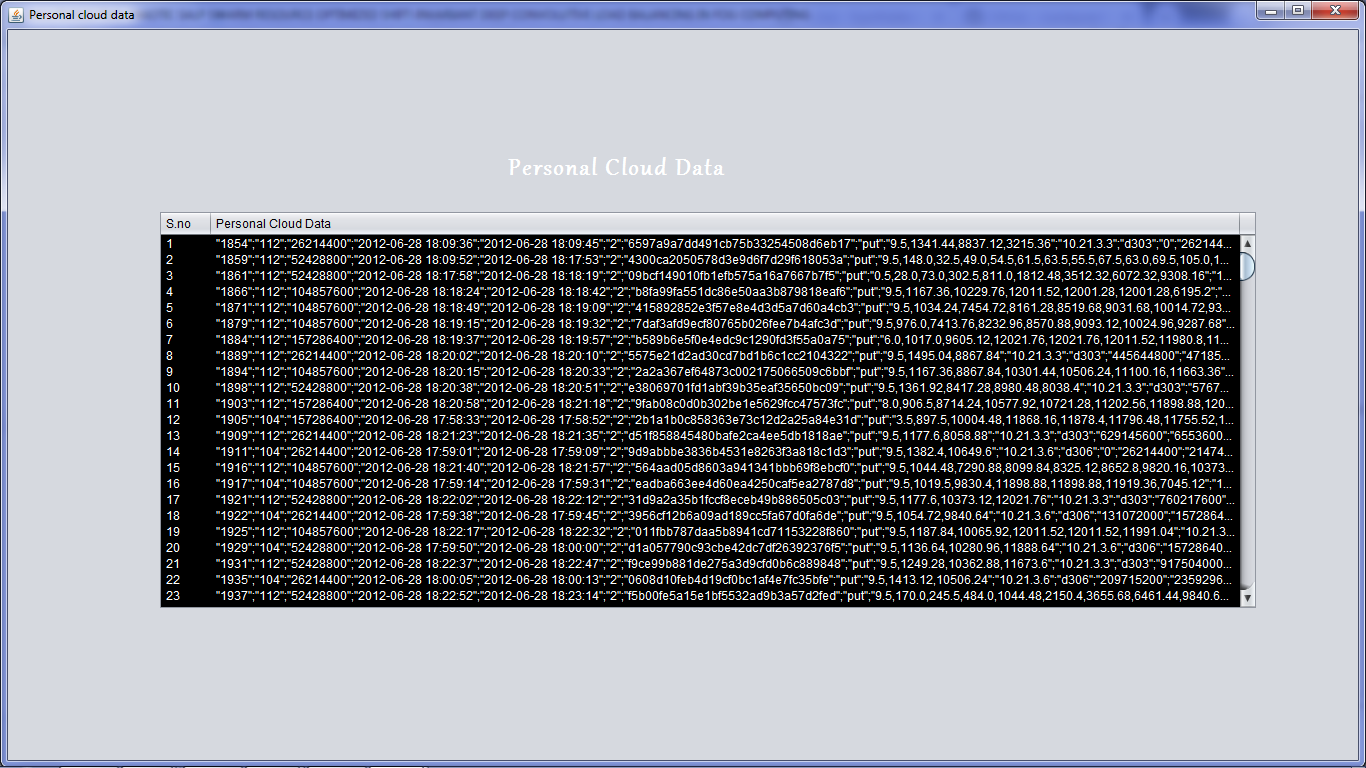
**

**ifogsim simulator input that selecting dataset screenshot-Figure-5**

**
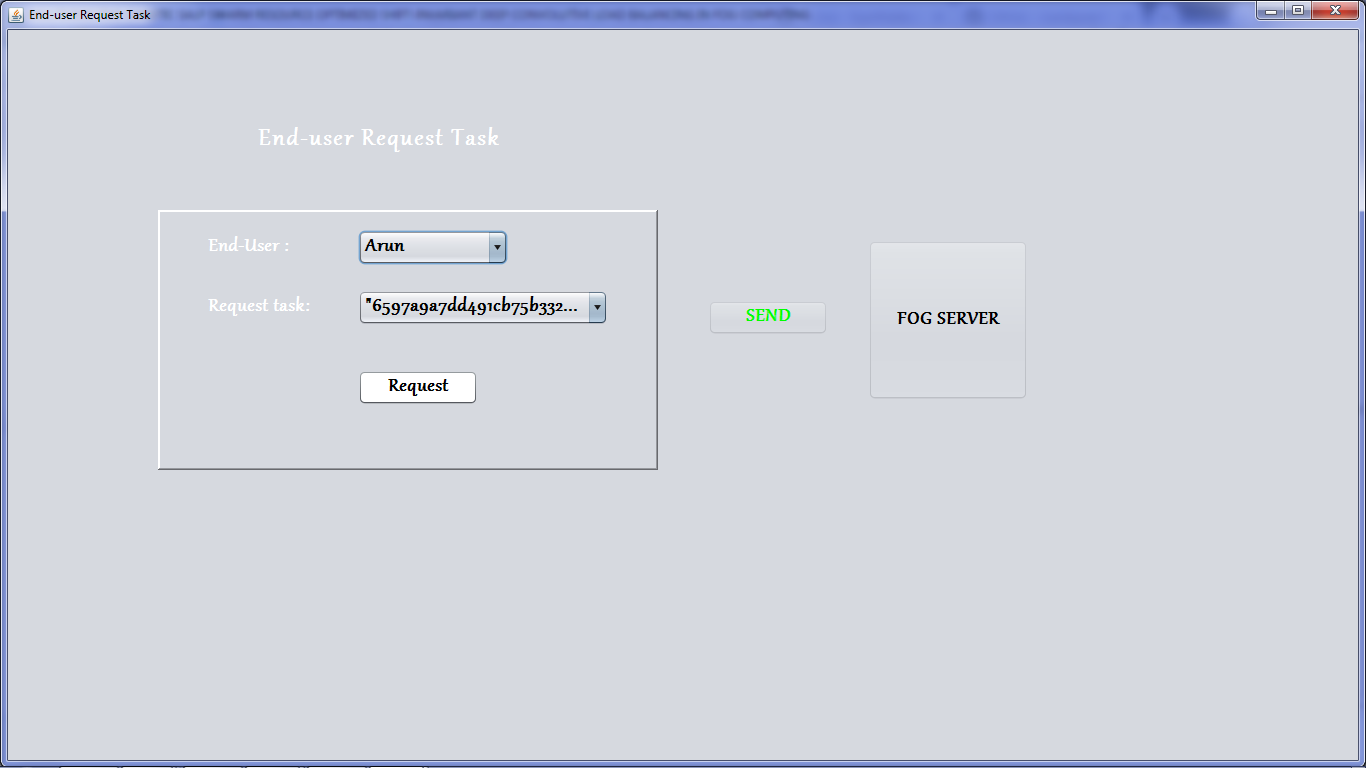
**

**ifogsim simulator input that selecting dataset screenshot-Figure-6**

**
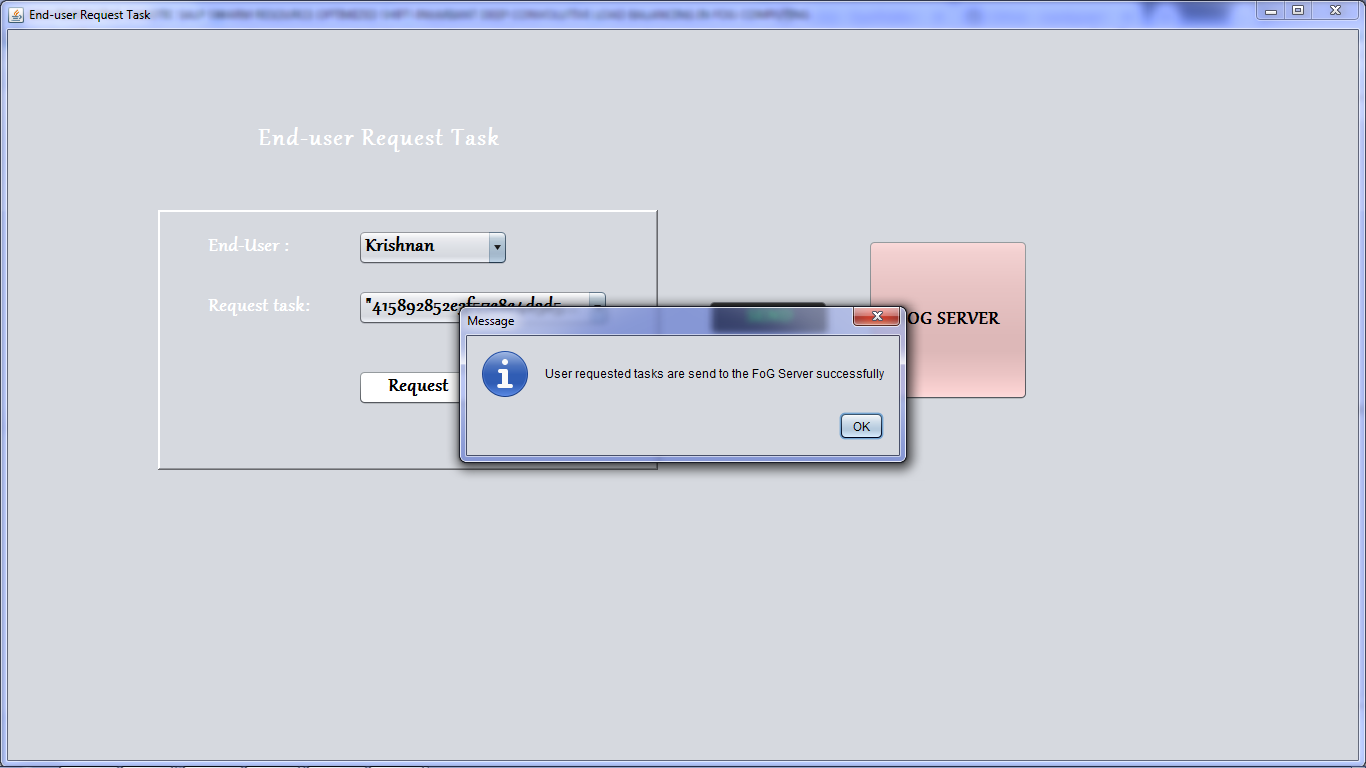
**

**ifogsim simulator input that selecting dataset screenshot-Figure-7**

**
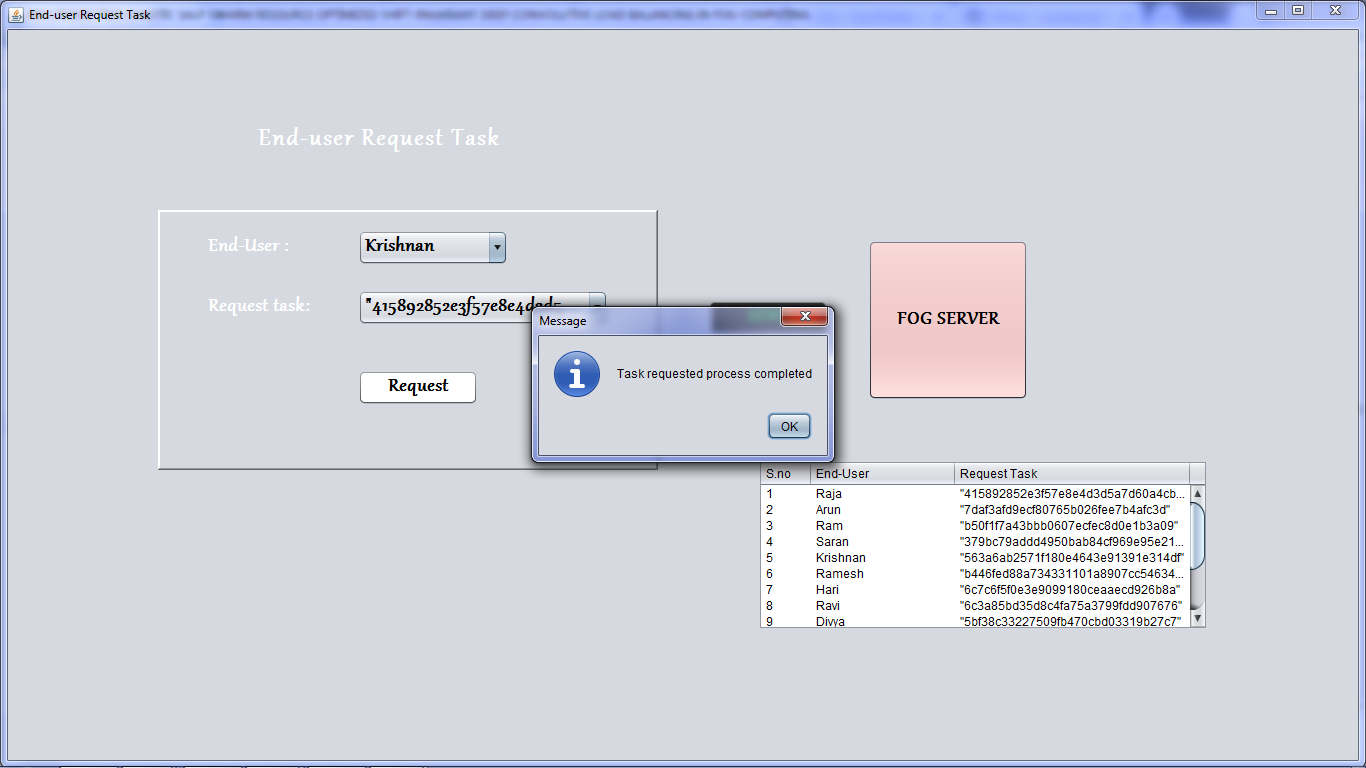
**

**ifogsim simulator input that selecting dataset screenshot-Figure-8**

**
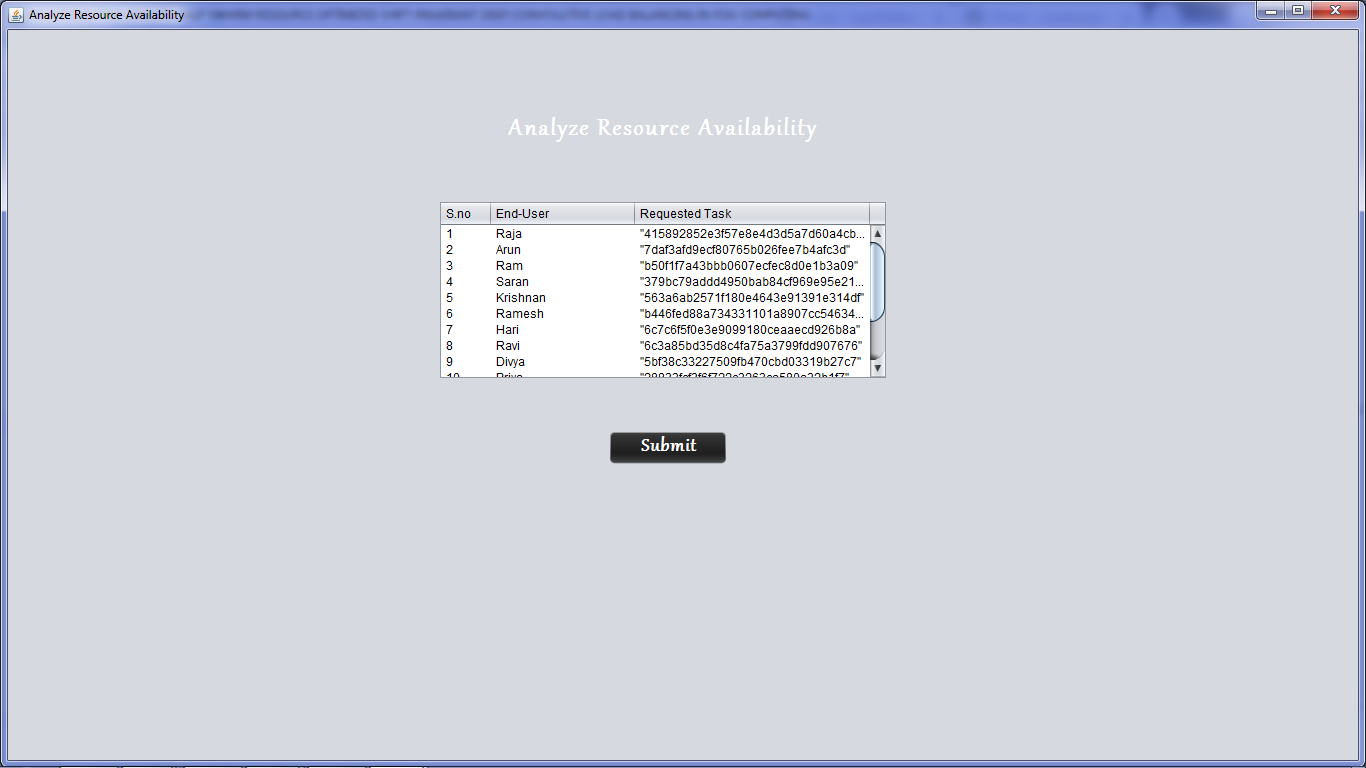
**

**ifogsim simulator input that selecting dataset screenshot-Figure-9**

**
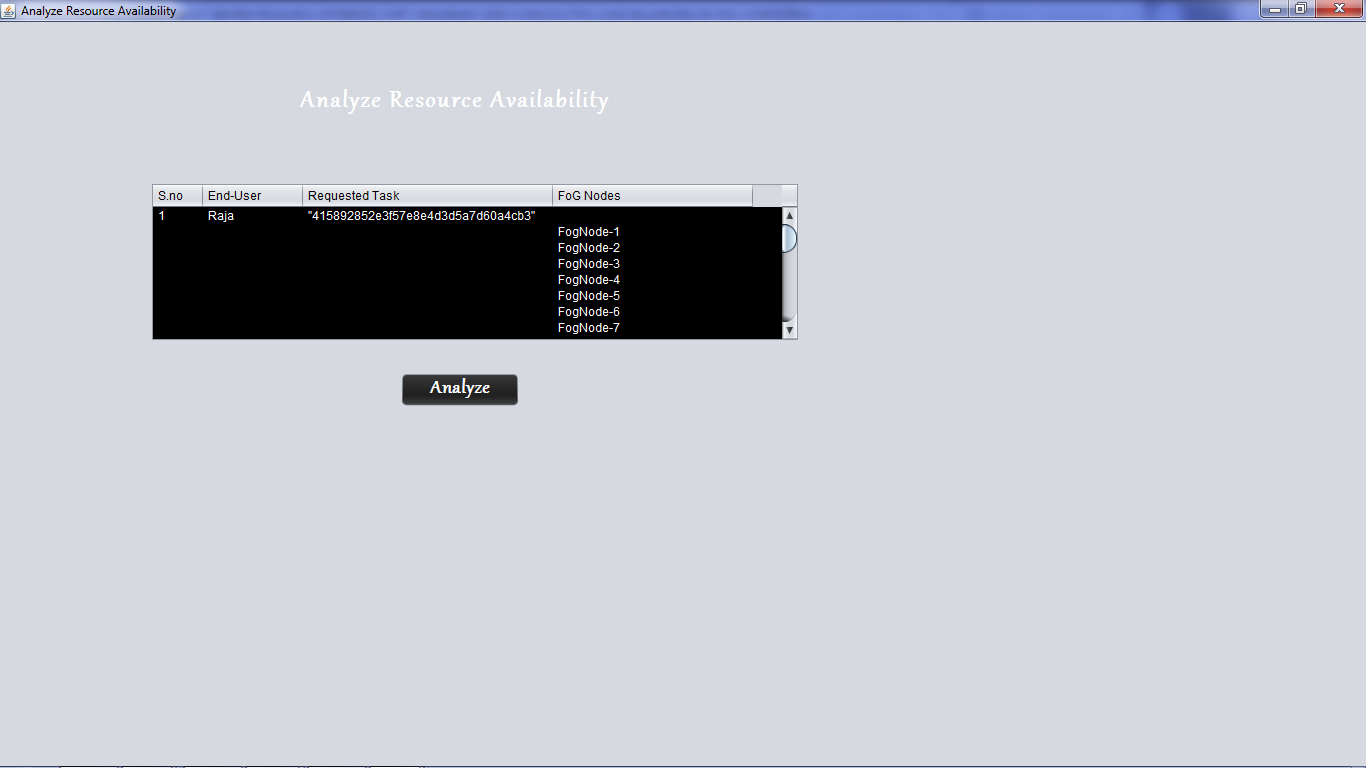
**

**ifogsim simulator input that selecting dataset screenshot-Figure-10**

**
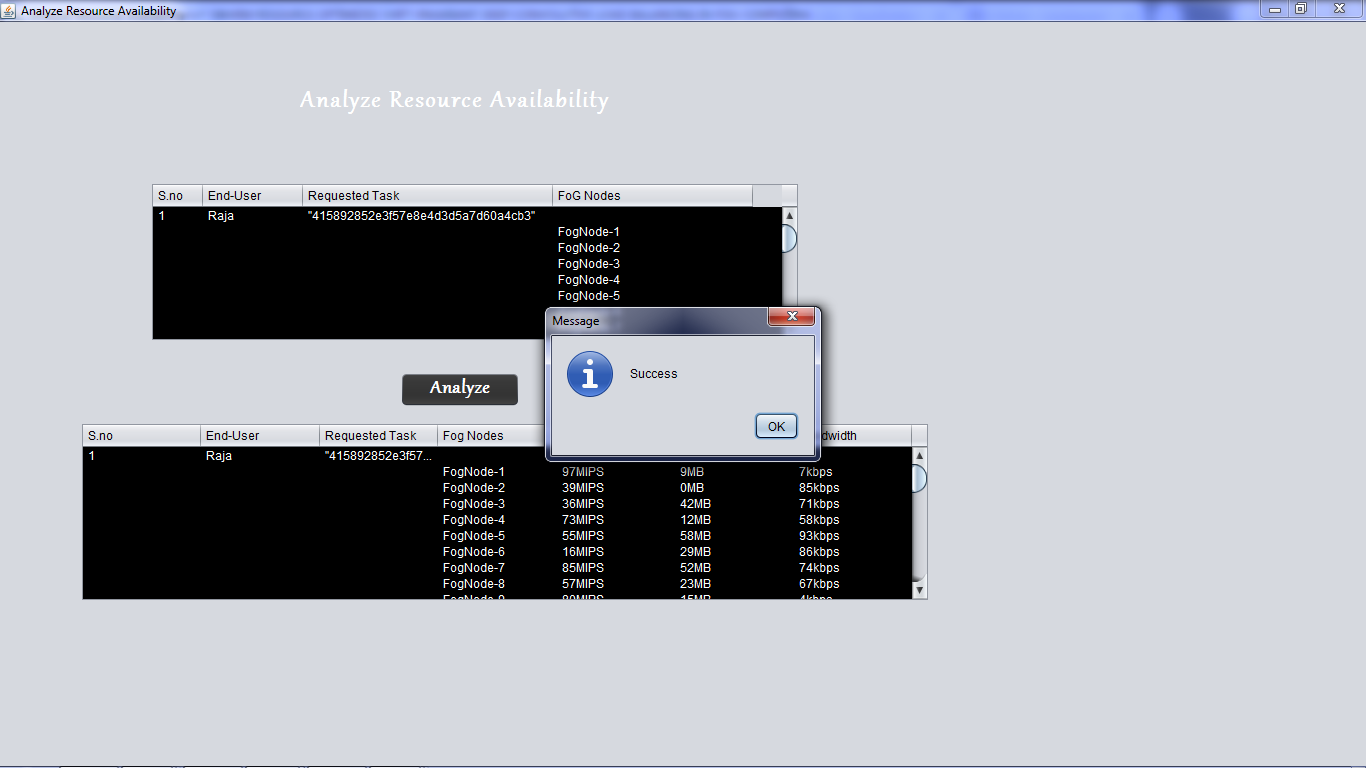
**

**ifogsim simulator input that selecting dataset screenshot-Figure-11**

**
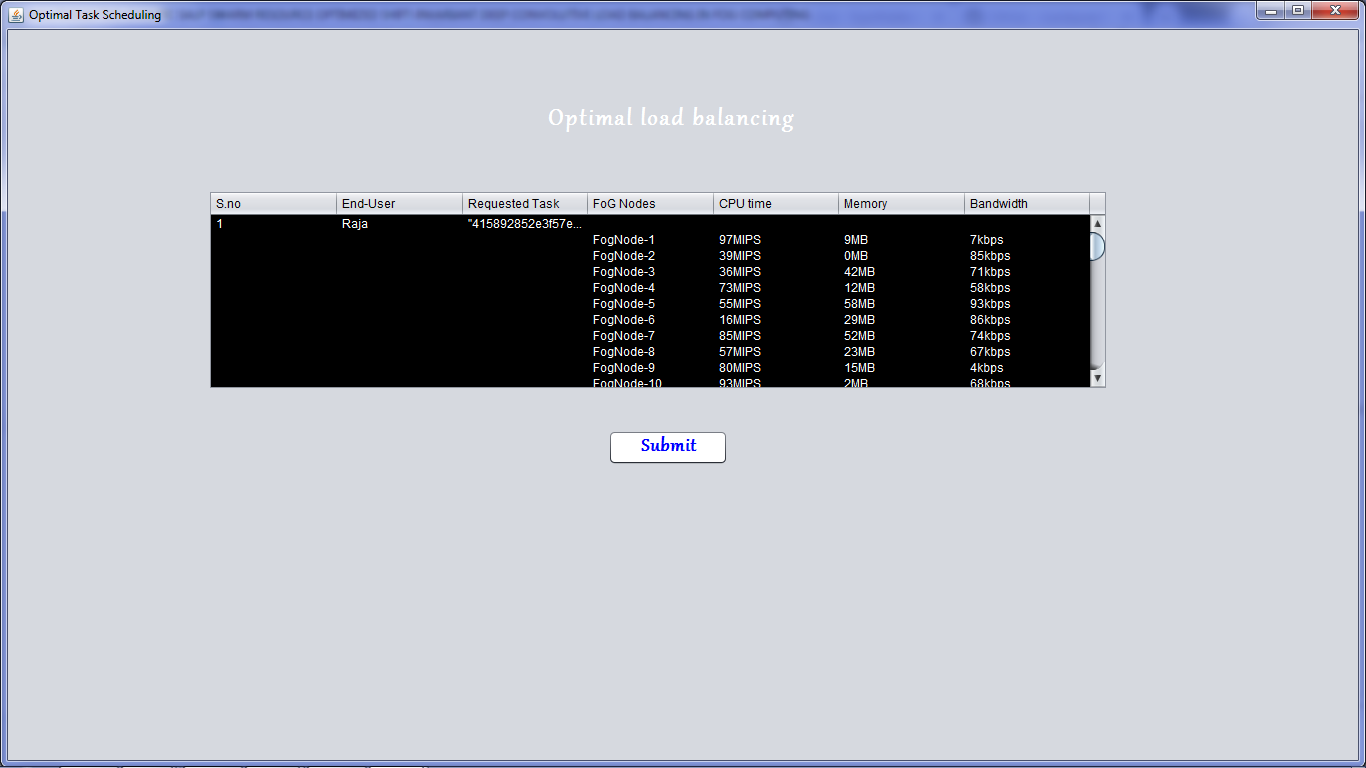
**

**ifogsim simulator input that selecting dataset screenshot-Figure-12**

**
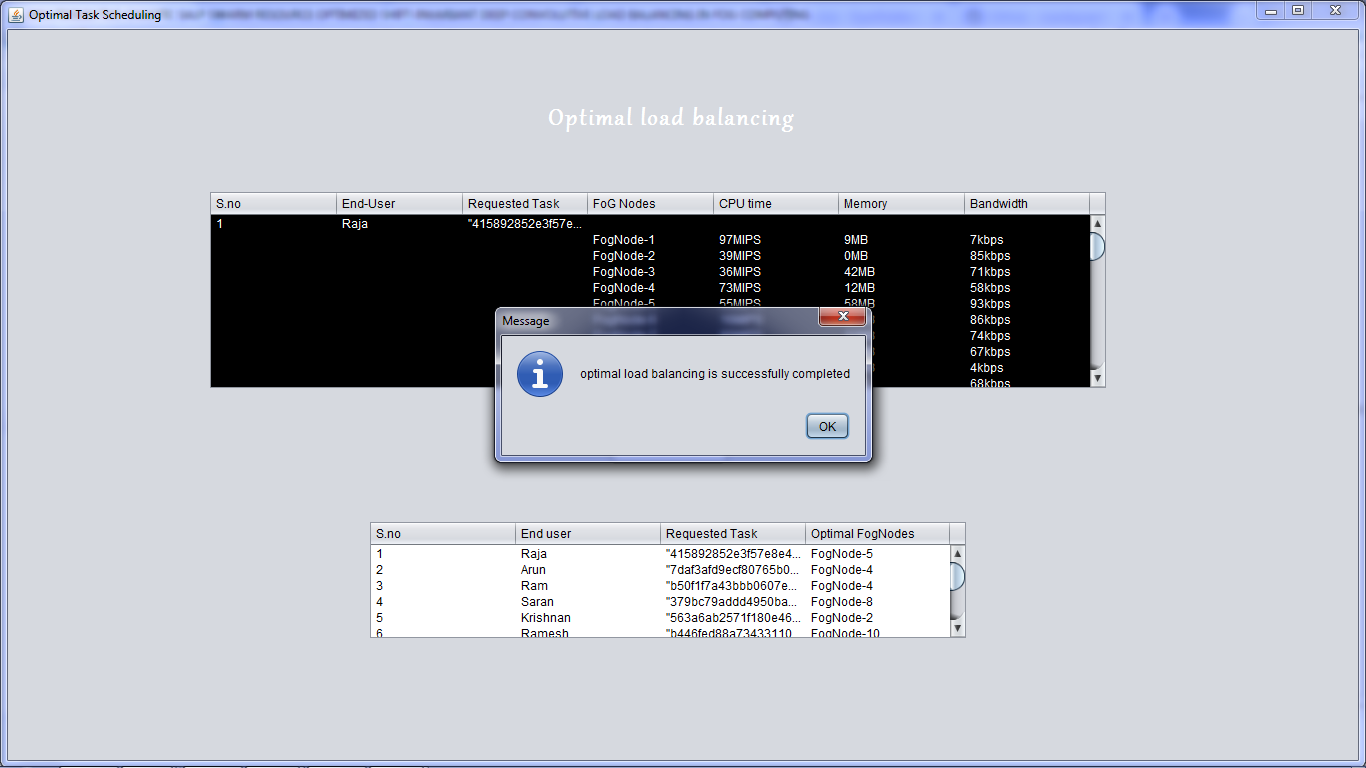
**

**ifogsim simulator input that selecting dataset screenshot-Figure-13**

**
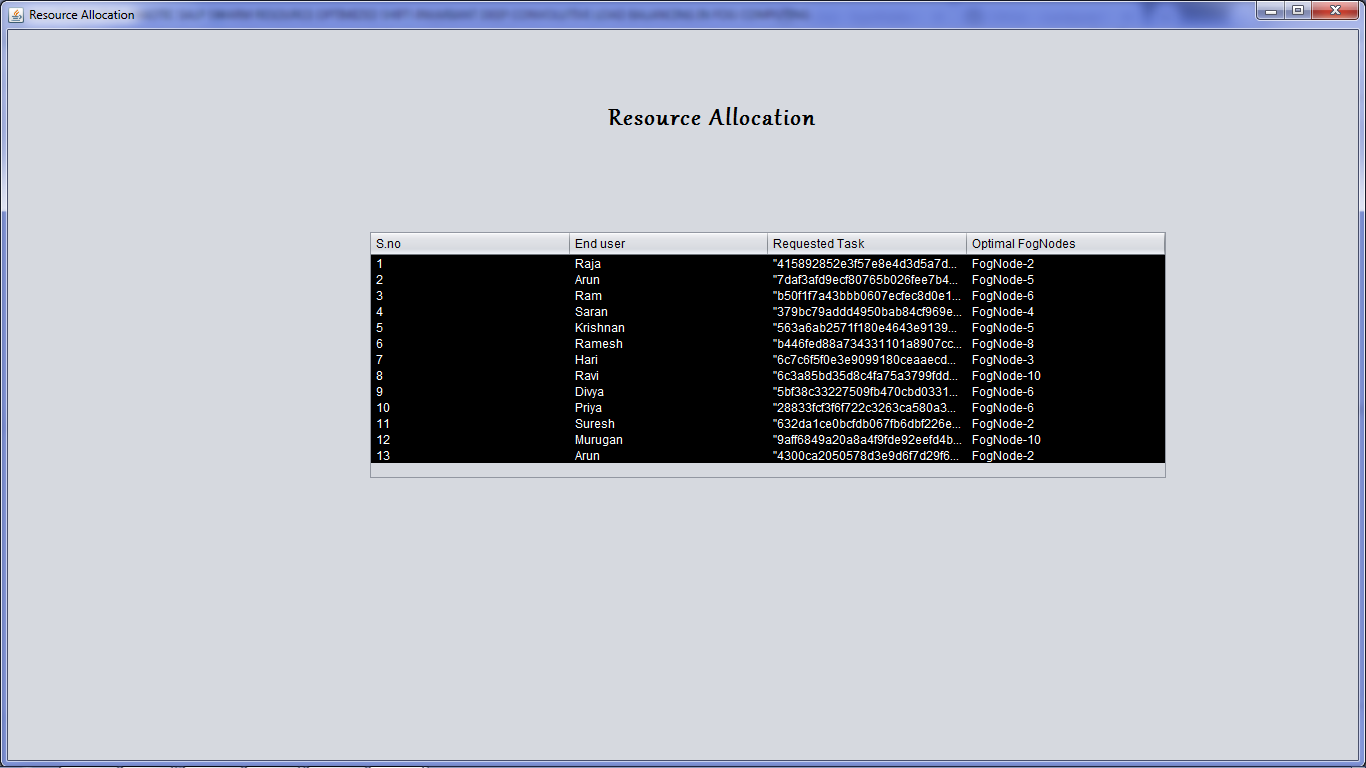
**

**ifogsim simulator input that selecting dataset screenshot-Figure-14**

**Figure1 Load balancing efficiency (%)**

**ifogsim simulator output for Load balancing efficiency screenshot-Figure-15**

**Figure 2 Makespan (ms)**

**ifogsim simulator output for makespan efficiency screenshot-Figure-16**

**Figure3 Latency (ms)**

**ifogsim simulator output for Latency(ms) efficiency screenshot-Figure-17**

**Figure 4 Energy consumption (J)**

**ifogsim simulator output for energy consumption efficiency screenshot-Figure-18**
