# Supplementary material for: Differential Grey Wolf Load-Balanced Stochastic Bellman Deep Reinforced Resource Allocation in Fog Environment
Source: Hindawi journal article supplement (doi:10.1155/2022/3183701), 2022-08-19
Supplement: f1 [file 3183701.f1.zip › 3183701.f1/Supporting file2_Tables (1).docx]

List of Tables, Descriptions and Metric Calculations

1. Table 1 storage layer description

| S. No | Rows | Description |
| --- | --- | --- |
| 1 | Volume | Considered as a directory with 3 types of volumes: i) root/predefined, ii) udf (user defined folder) and iii) share (sub-volume of another user to which the current user has access). |
| 2 | Node | A node is a file or a directory in the system. |
| 3 | Session | Session is used to identify requests of a single user during session lifetime that does not expire automatically. The client may disconnect, or server may go down, therefore resulting in the end of the session |
| 4 | Request types | There are different request types. They are storage, session and rpc. |

1. Table 2 Column fields description

| S. No | Features or attributes | Description |
| --- | --- | --- |
| 1 | Row_id | Database row identifier |
| 2 | Account_id | Personal cloud account |
| 3 | File_size | Size of the uploaded file |
| 4 | Operation_time_start | Starting time of the API call |
| 5 | Operation_time_end | Ending time of the API call |
| 6 | Time_zone | Time zone of a node |
| 7 | Operation_ID | ID of API call |
| 8 | Operation_Type | Type of API call |
| 9 | Bandwidth_Trace | Time series trace |
| 10 | Node_ip | IP address of node |
| 11 | Node_name | Name of node |
| 12 | Quota_start | Amount of data at the starting of API call |
| 13 | Quota_end | Amount of data at the end of API call |
| 14 | Quota_total | Total amount of data |
| 15 | Capped | Capped or not |
| 16 | Failed | Indicates if API has failed |
| 17 | Failure | Available failure information |

1. Load balancing efficiency

**Table 3 Simulation results for load balancing efficiency**

| Number of tasks | Load balancing efficiency (%) | | |
| --- | --- | --- | --- |
| DGW-SBDR | DEER | load balancing for FoT-Gateways |
| 5000 | 97.7 | 94.7 | 93.1 |
| 10000 | 96.35 | 93.15 | 91.85 |
| 15000 | 95.85 | 93 | 91 |
| 20000 | 94.25 | 92.75 | 89.95 |
| 25000 | 94.15 | 92.55 | 89.35 |
| 30000 | 93.85 | 92.15 | 89.15 |
| 35000 | 92.15 | 91 | 88.35 |
| 40000 | 91.35 | 90.35 | 86.25 |
| 45000 | 91 | 88.15 | 85.15 |
| 50000 | 90.25 | 86.35 | 83 |

1. Makespan

**Table 4 Simulation results for makespan**

| Number of tasks | Makespan (ms) | | |
| --- | --- | --- | --- |
| DGW-SBDR | DEER | load balancing for FoT-Gateways |
| 5000 | 12.5 | 15 | 17.5 |
| 10000 | 14.35 | 17.85 | 22.35 |
| 15000 | 16.15 | 21.45 | 25.15 |
| 20000 | 18.25 | 23.25 | 29 |
| 25000 | 21 | 25 | 31.35 |
| 30000 | 23.55 | 28.15 | 33 |
| 35000 | 25.25 | 31.35 | 35.45 |
| 40000 | 28.15 | 33.45 | 37 |
| 45000 | 30.45 | 35 | 41.35 |
| 50000 | 33.25 | 40.25 | 44 |

1. Latency

**Table 5 Simulation results for latency**

| Number of tasks | Latency (ms) | | |
| --- | --- | --- | --- |
| DGW-SBDR | DEER | load balancing for FoT-Gateways |
| 5000 | 5250 | 6750 | 7750 |
| 10000 | 5535 | 7135 | 8250 |
| 15000 | 5815 | 8245 | 8835 |
| 20000 | 6025 | 8295 | 9515 |
| 25000 | 6135 | 8355 | 9735 |
| 30000 | 6245 | 8515 | 9915 |
| 35000 | 6535 | 8925 | 10155 |
| 40000 | 6915 | 9015 | 10235 |
| 45000 | 7025 | 9125 | 10535 |
| 50000 | 7345 | 10355 | 10825 |

1. Energy consumption

Energy consumption refers to the amount of energy utilized for balancing with optimal resource allocation. In other words, it is the total amount of energy consumed to providethe services (i.e., allocation of resources) to the end users. Energy conservation in turn therefore results in more effective mechanisms hence minimizing the wastageof resources.

From the above equation (), energy consumption ‘’ is measured based on the user requested tasks waiting in the queue ‘’ and the energy consumed for the allocation of resources ‘’. It is measured in terms of joules ‘’.

**Table 6 Simulation results for energy consumption**

| Number of tasks | Energy consumption (J) | | |
| --- | --- | --- | --- |
| DGW-SBDR | DEER | load balancing for FoT-Gateways |
| 5000 | 25 | 30 | 40 |
| 10000 | 30 | 35 | 45 |
| 15000 | 30 | 35 | 50 |
| 20000 | 35 | 40 | 55 |
| 25000 | 40 | 45 | 55 |
| 30000 | 40 | 45 | 60 |
| 35000 | 45 | 50 | 65 |
| 40000 | 50 | 55 | 65 |
| 45000 | 55 | 60 | 70 |
| 50000 | 55 | 65 | 75 |
